# Supplementary material for: Clustering trees: a visualization for evaluating clusterings at multiple resolutions
Source: PubMed Central journal article supplement (PMC6057528; doi:10.1093/gigascience/giy083), 2018-07-11
Supplement: giy083_response_to_reviewer_comments_revision_1.pdf [file giy083_response_to_reviewer_comments_revision_1.pdf]

## Author's Response To Reviewer Comments

Close

We have now made the changes to the formatting requested by the editor.

Close
